# Supplementary material for: Efficiency enhancement of CZTSe solar cells based on in situ K-doped precursor
Source: Royal Society of Chemistry journal article supplement (doi:10.1039/d2ta09916k), 2023-01-01
Supplement: d2ta09916k1.pdf [file d2ta09916k1.pdf]

# Journal Name

ARTICLE TYPE

Supplementary Information

Table 1 The intensity ratio of the undoped to doped absorbers under different excitation energy( $W/cm^2$ )

| Excitation energy | 0.212 | 0.282 | 0.360 | 0.445 | 0.535 |
|-------------------|-------|-------|-------|-------|-------|
| Ratio             | 5.096 | 4.942 | 5.071 | 5.531 | 5.796 |

Table 2 The element content of the annealed absorbers detected by EPMA(%)

| Temperature | Cu    | Zn    | Sn    | Se    | S    | Na   | K    |
|-------------|-------|-------|-------|-------|------|------|------|
| Undoped     |       |       |       |       |      |      |      |
| 480°C       | 24.06 | 14.40 | 14.85 | 44.72 | 1.32 | 0.64 | 0.01 |
| 495°C       | 23.45 | 14.08 | 13.44 | 47.22 | 0.85 | 0.96 | 0.01 |
| 510°C       | 22.89 | 13.87 | 12.83 | 48.56 | 0.76 | 1.09 | 0.01 |
| 525°C       | 22.35 | 13.54 | 12.62 | 49.46 | 0.93 | 1.09 | 0.01 |
| 540°C       | 25.16 | 15.21 | 13.17 | 44.72 | 0.79 | 0.94 | 0.01 |
| Doped       |       |       |       |       |      |      |      |
| 480°C       | 23.27 | 14.22 | 13.09 | 48.02 | 0.32 | 1.06 | 0.02 |
| 495°C       | 22.44 | 13.73 | 12.82 | 49.31 | 0.25 | 1.43 | 0.01 |
| 510°C       | 23.34 | 14.62 | 13.10 | 47.07 | 0.68 | 1.15 | 0.04 |
| 525°C       | 22.73 | 13.67 | 12.85 | 49.25 | 0.25 | 1.26 | 0.01 |
| 540°C       | 23.32 | 14.09 | 12.65 | 48.21 | 0.34 | 1.35 | 0.02 |

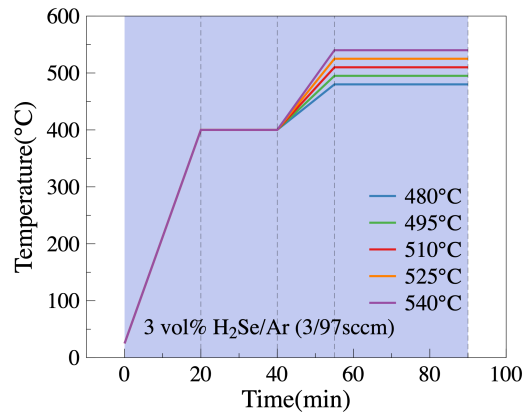

Fig. 1 The annealing temperature versus time in the atmosphere of 3vol.%  $H_2Se/Ar$

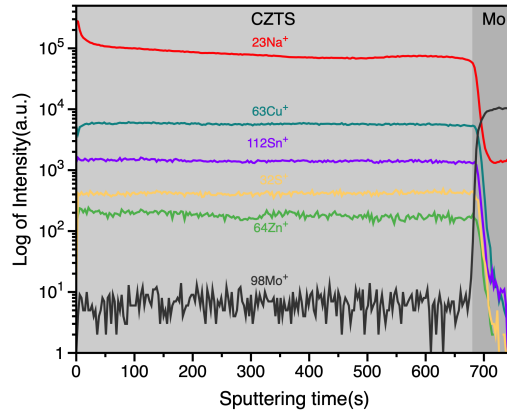

Fig. 2 SIMS depth profiling of in-situ sodium doped precursor, prepared by sputtering the quaternary CZTS ceramic target, in which 0.6at % sodium fluoride was pre-incorporated in.

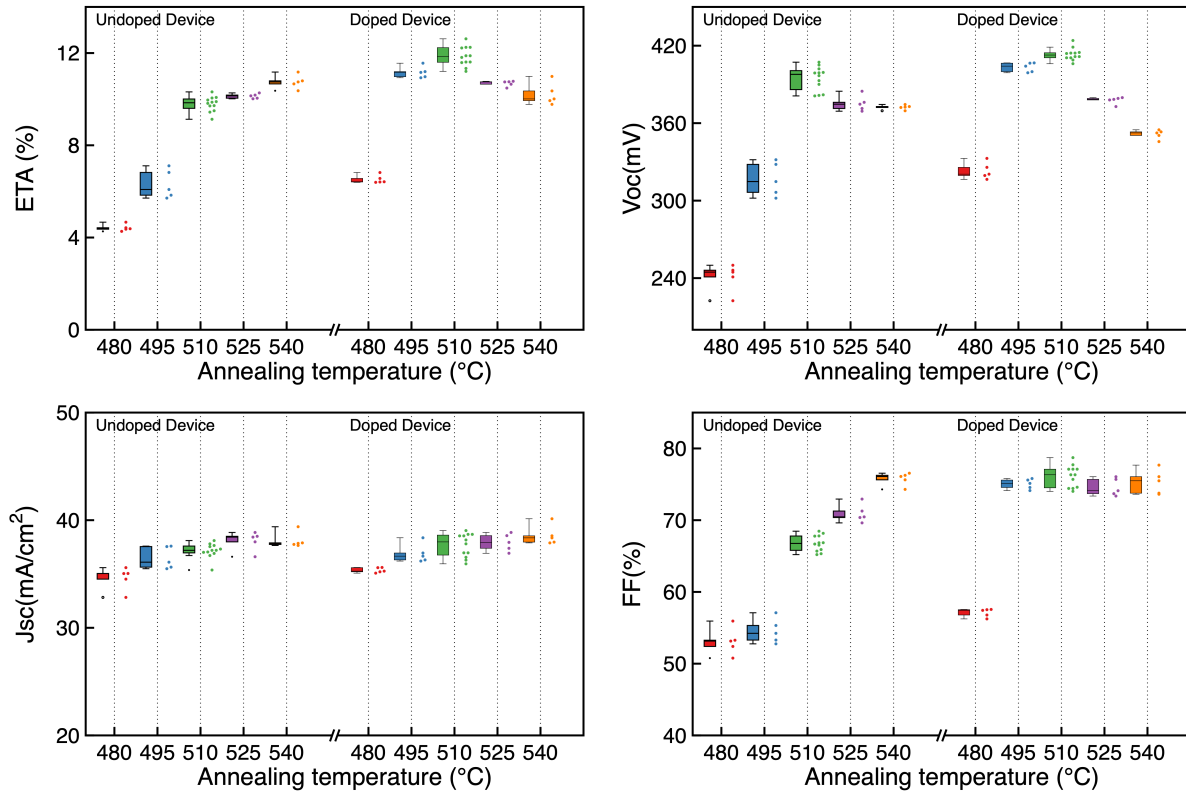

Fig. 3 Statistic box plots of the photovoltaic performance of solar cells with different selenization annealing temperature, respectively. Each group consists of at least 5 individual solar cells. For the optimal temperature (510°C), 12 individual cells were tested.

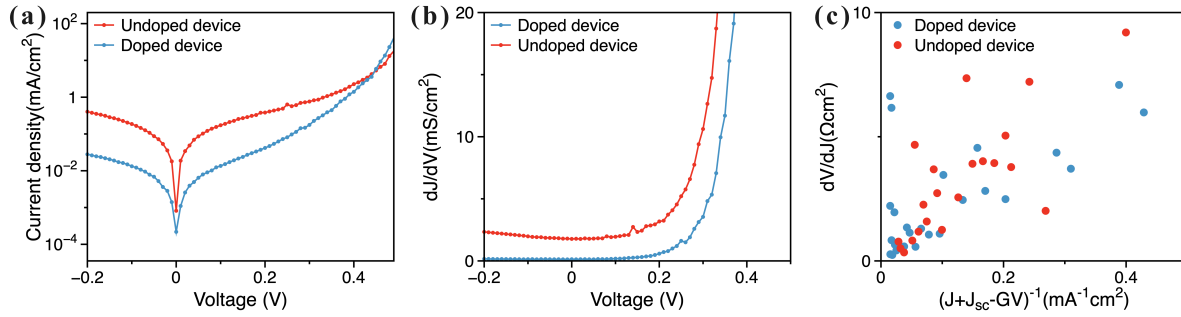

Fig. 4 (a) J-V curves of the undoped and doped devices measured in the dark, (b) Shunt resistance  $R_{sh}$  characterization, (c) Series resistance  $R_s$  and ideality factor  $A$  characterization.

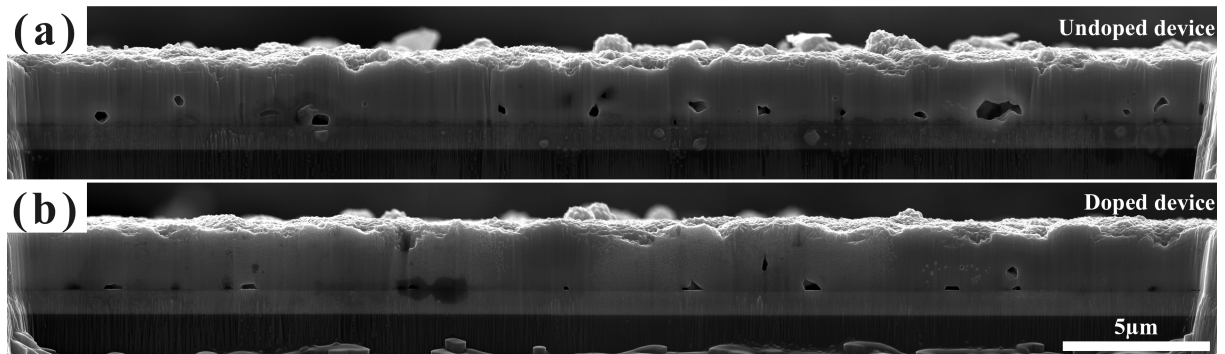

Fig. 5 Another focused ion beam cut cross section image of undoped and doped devices.

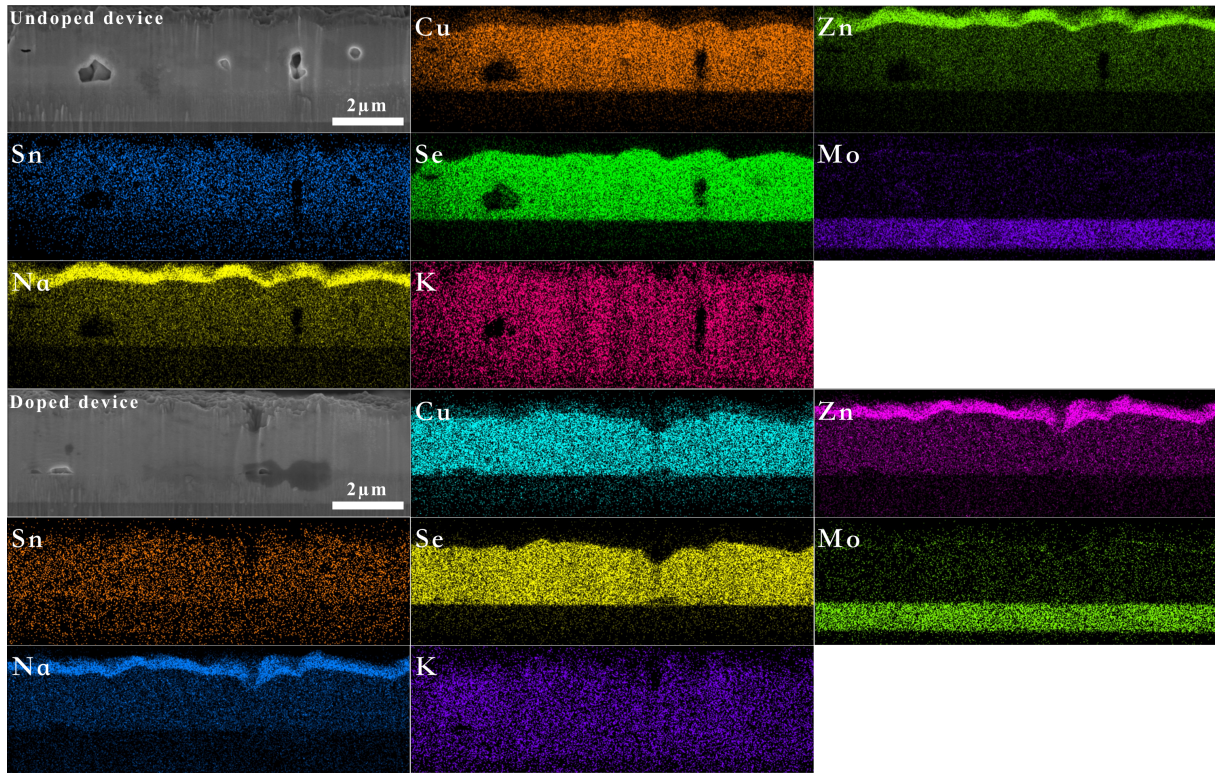

Fig. 6 EDS mapping of copper, zinc, tin, selenium, molybdenum, sodium and potassium on the FIB cut cross section of undoped and doped device. In this work, 5 nm thick platinum coating was applied to enhance the surface conductivity of sample, in order to avoid the charge accumulation on the surface. The dark area in Figure-S5(b) as well as on the surface SEM image of doped absorber could be caused by the different surface conductivity rooting in uneven platinum coating.

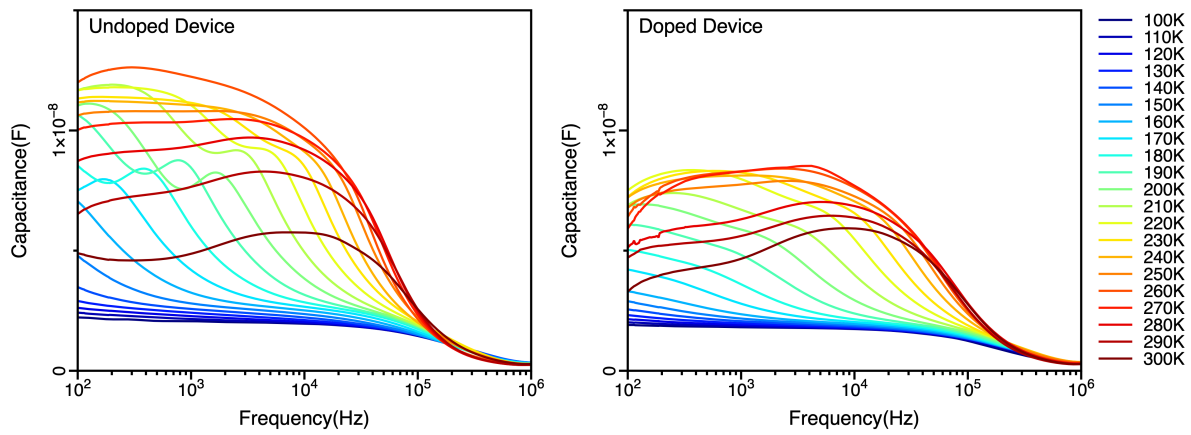

Fig. 7 Admittance spectroscopy(C-f-T) of undoped and doped device at different temperatures, the abnormal increased capacitance of device from 300K to 260K was explained as the enlarged defect capture cross sections as temperature decreased here.

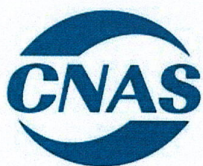

中国认可  
检测  
TESTING  
CNAS L2338

# TEST REPORT

Report No: PWQC-WT-P23022421-1R

**Sample Name** : Photovoltaic cell

**Client** : Tsinghua University

**Client Address** : 30 Shuangqing Rd, Hai Dian, Beijing

**Type of Project** : Consignation

PHOTOVOLTAIC AND WIND POWER SYSTEMS QUALITY TEST CENTER, IEE,  
CHINESE ACADEMY OF SCIENCES

February, 28, 2023

PHOTOVOLTAIC AND WIND POWER SYSTEMS QUALITY TEST CENTER, IEE,  
CHINESE ACADEMY OF SCIENCES

Report No: PWQC-WT-P23022421-1R

**Testing information:**

Date: February, 24, 2023

Location: No.6 Bei-er-tiao, Zhongguancun, Haidian district, Beijing, China

Environmental conditions: 24.6℃, 29.5%RH

**Testing items:**

Measurement of photovoltaic current-voltage characteristics

**Standards:**

IEC 60904-1: 2006 Photovoltaic (PV) devices

— Part 1: Measurement of photovoltaic current-voltage characteristics

**Equipments:**

| Name               | S/N      | Expired date |
|--------------------|----------|--------------|
| Solar simulator    | LE106-04 | 2023-06-15   |
| Source Meter       | LE177-01 | 2023-02-27   |
| Digital millimeter | LE126-01 | 2024-02-22   |
| Reference cell     | J-CH04   | 2023-11-09   |

Edited

by(signatory): Yang lei

Date: 2023.2.28

Approved

by(signatory): Jiang Feifei

Date: 2023.2.28

PHOTOVOLTAIC AND WIND POWER SYSTEMS QUALITY TEST CENTER, IEE,  
CHINESE ACADEMY OF SCIENCES

Report No: PWQC-WT-P23022421-1R

|                        |                                                                        |
|------------------------|------------------------------------------------------------------------|
| <b>Sample code</b>     | DC2023a007                                                             |
| <b>Sample S/N</b>      | K-1                                                                    |
| <b>Type</b>            | Single Junction Kesterite Solar Cell                                   |
| <b>Designated area</b> | 0.30cm <sup>2</sup><br>The designated area was provided by the client. |

|                                                                                                                                     |                                                             |                               |            |                        |                     |
|-------------------------------------------------------------------------------------------------------------------------------------|-------------------------------------------------------------|-------------------------------|------------|------------------------|---------------------|
| Items of testing                                                                                                                    | Measurement of photovoltaic current-voltage characteristics |                               |            |                        |                     |
| Sample code                                                                                                                         | DC2023a007                                                  |                               |            |                        |                     |
| Results                                                                                                                             | Isc<br>(mA)                                                 | Jsc<br>(mA/ cm <sup>2</sup> ) | Voc<br>(V) | Pm<br>(mW)             | File                |
|                                                                                                                                     | 11.680                                                      | 38.935                        | 0.415      | 3.799                  | A202302241<br>62456 |
|                                                                                                                                     | Ipm<br>(mA)                                                 | Vpm<br>(V)                    | FF<br>(%)  | E <sub>ff</sub><br>(%) |                     |
|                                                                                                                                     | 10.409                                                      | 0.365                         | 78.33      | 12.66                  |                     |
| Measurement uncertainty:<br>U <sub>95(Isc)</sub> =1.9% (k=2)<br>U <sub>95(Voc)</sub> =1.8% (k=2)<br>U <sub>95(Pm)</sub> =2.5% (k=2) |                                                             |                               |            |                        |                     |

Report No: PWQC-WT-P23022421-1R

STC

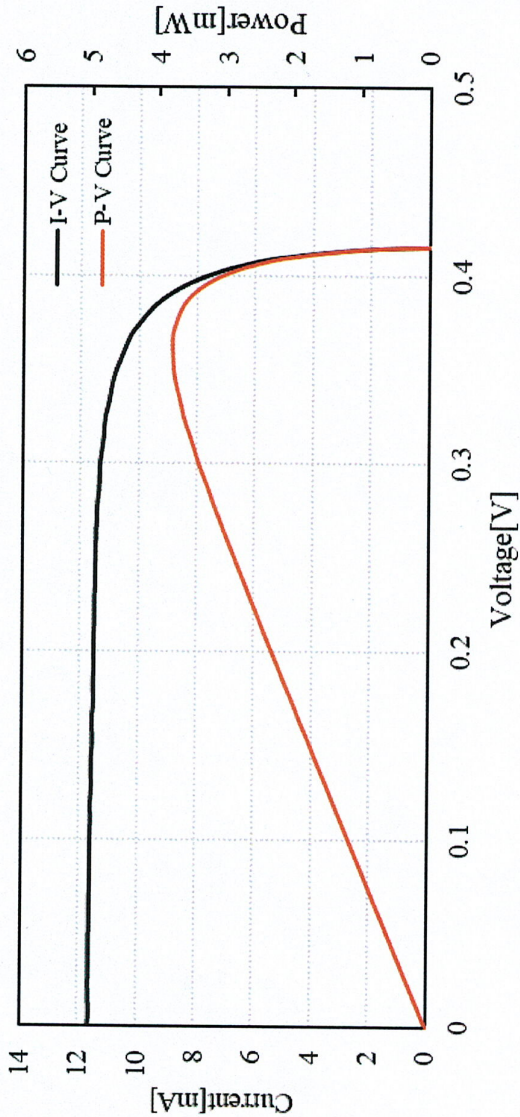

Type Single Junction Kesterite Solar Cell  
Ser.No DC2023a007

|                 |                           |
|-----------------|---------------------------|
| Area            | 0.3000 cm <sup>2</sup>    |
| Isc             | 11.680 mA                 |
| Jsc             | 38.935 mA/cm <sup>2</sup> |
| Voc             | 0.415 V                   |
| FF              | 78.33 %                   |
| Pm              | 3.799 mW                  |
| E <sub>ff</sub> | 12.66 %                   |
| Ipm             | 10.409 mA                 |
| Vpm             | 0.365 V                   |
| Voltage Sweep   | Reverse                   |
| Sweep time      | 1.41 s                    |
| Temp            | 25 °C                     |
| Irr             | 100 mW/cm <sup>2</sup>    |
| File            | A20230224162456           |

— End of Report —

## NOTICE

1. The test result in this report relate only to the sample tested.
2. This report is not available without seal of Photovoltaic and Wind Power Systems Quality Test Center, IEE, Chinese Academy of Sciences (PWQTC) . Additionally, Appendix pages are not available without seal of PWQTC.
3. The content of this report may not be changed. The report shall not be as any specific commercial advertisement without written permission of the PWQTC.
4. Any copy of this report is not available without seal of PWQTC.
5. This report may not be reproduced in any form or by any means, without permission in writing from the PWQTC.
6. Client could contact us for any questions within 15 days since the date when you received this report.

Address: No.6 Bei-er-tiao, Zhongguancun, Haidian district, Beijing, China

Post code: 100190

Fax: +86-10-82547052-607

Tel: +86-10-82547051

E-mail: pvcenter@mail.iee.ac.cn
